# Supplementary material for: Time of day and network reprogramming during drought induced CAM photosynthesis in Sedum album
Source: PubMed Central journal article supplement (PMC6594660; doi:10.1371/journal.pgen.1008209), 2019-06-14

(a)

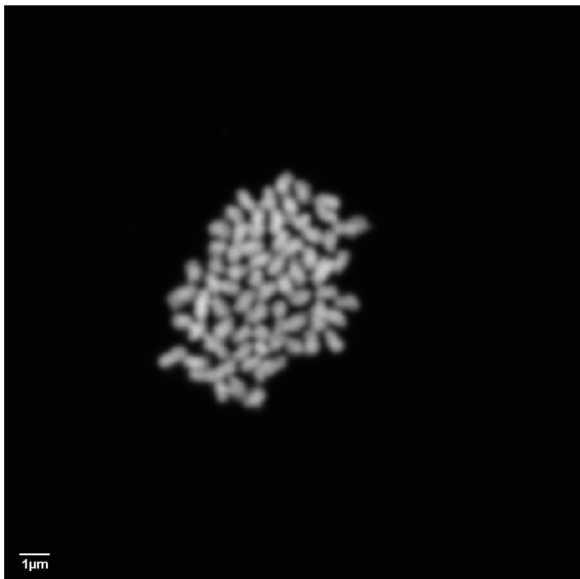

(b)

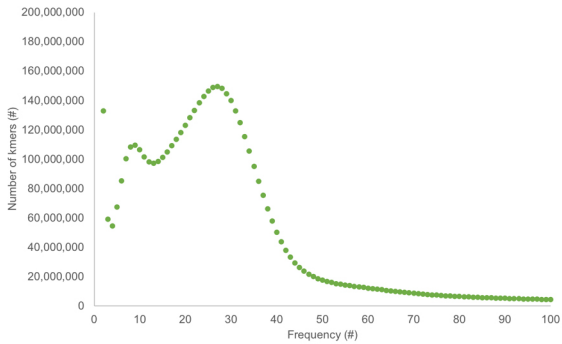

Supplement: pgen.1008209.s001.pdf [file pgen.1008209.s001.pdf]
