# Supplementary material for: Time of day and network reprogramming during drought induced CAM photosynthesis in Sedum album
Source: PubMed Central journal article supplement (PMC6594660; doi:10.1371/journal.pgen.1008209), 2019-06-14

# PRR3/PRR7

## PRR1

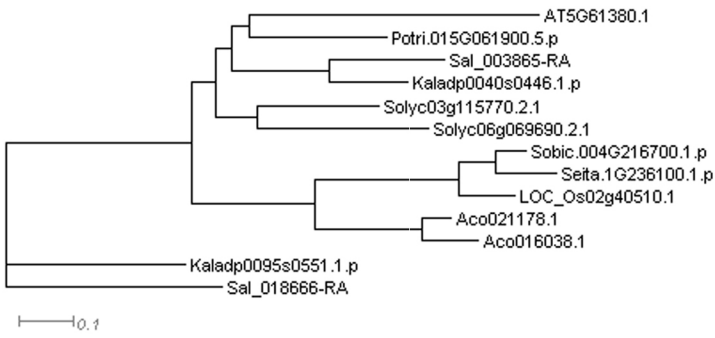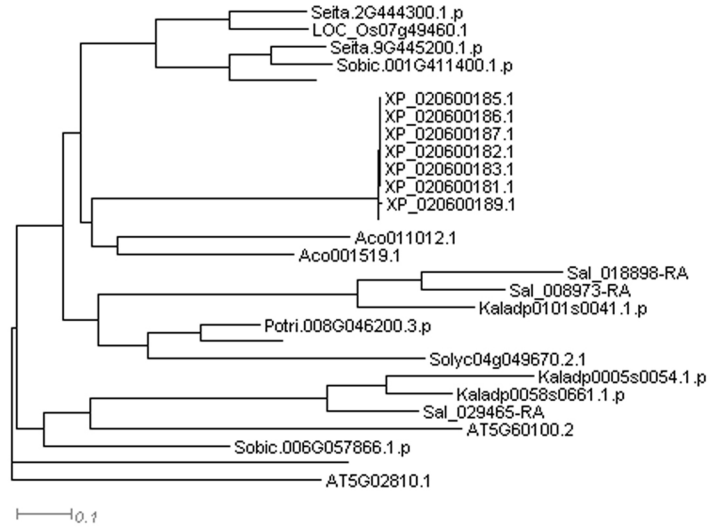

## PRR5

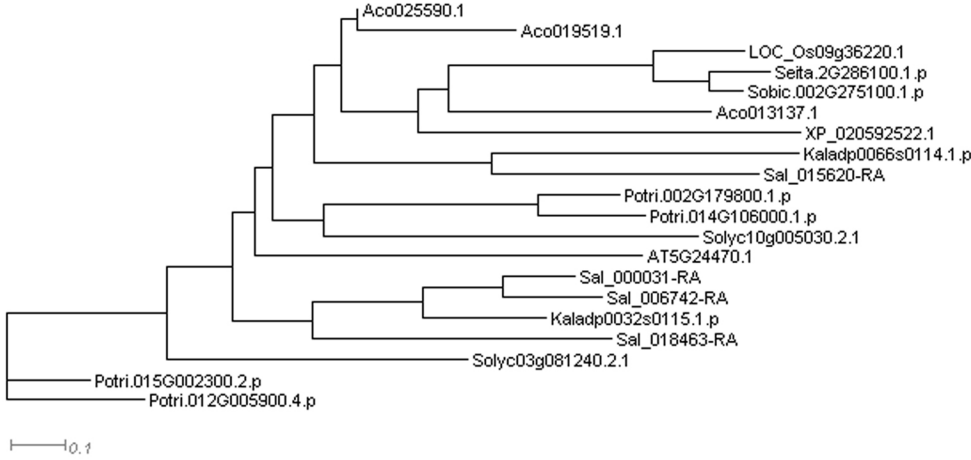

## CCA1/LHY

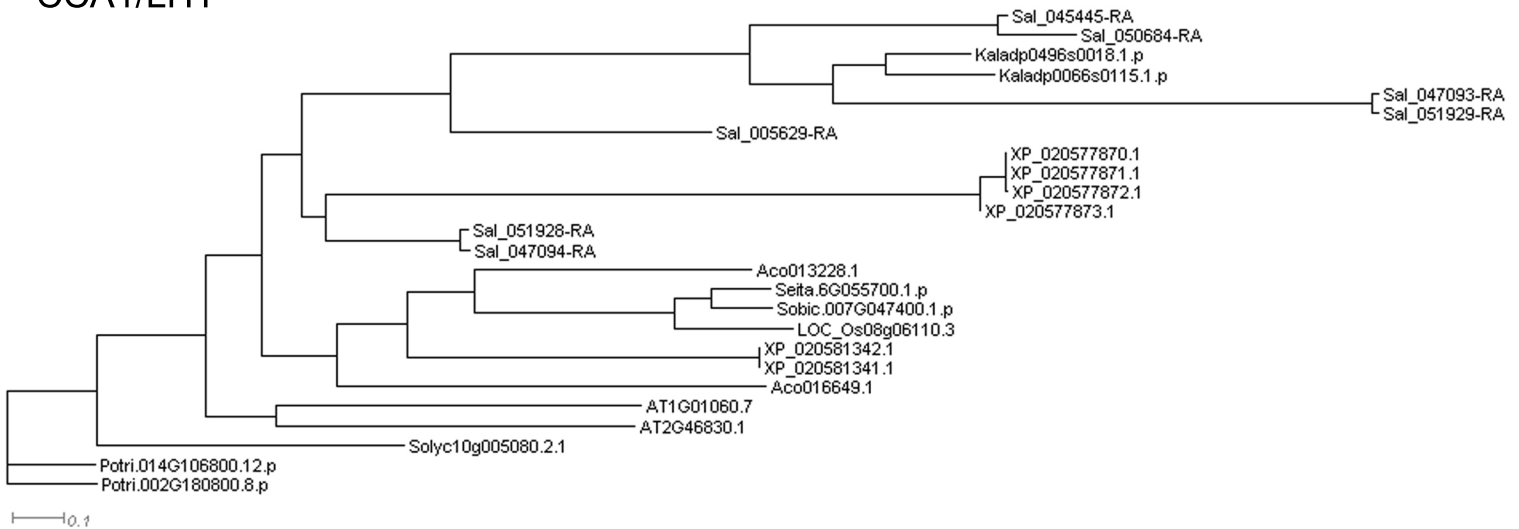

Supplement: pgen.1008209.s007.pdf [file pgen.1008209.s007.pdf]
