# Supplementary material for: Time of day and network reprogramming during drought induced CAM photosynthesis in Sedum album
Source: PubMed Central journal article supplement (PMC6594660; doi:10.1371/journal.pgen.1008209), 2019-06-14
Supplement: pgen.1008209.s011.pdf [file pgen.1008209.s011.pdf]

### (a) Starch synthesis

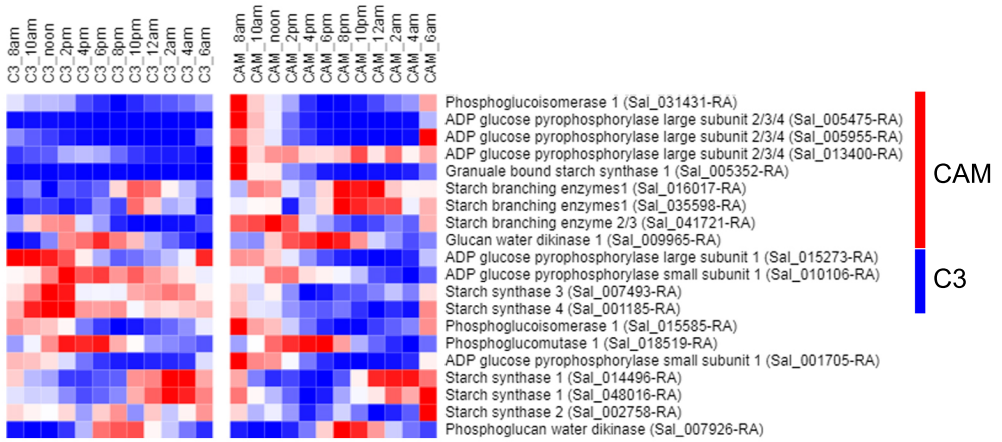

### (b) Cytosolic PGI bypass

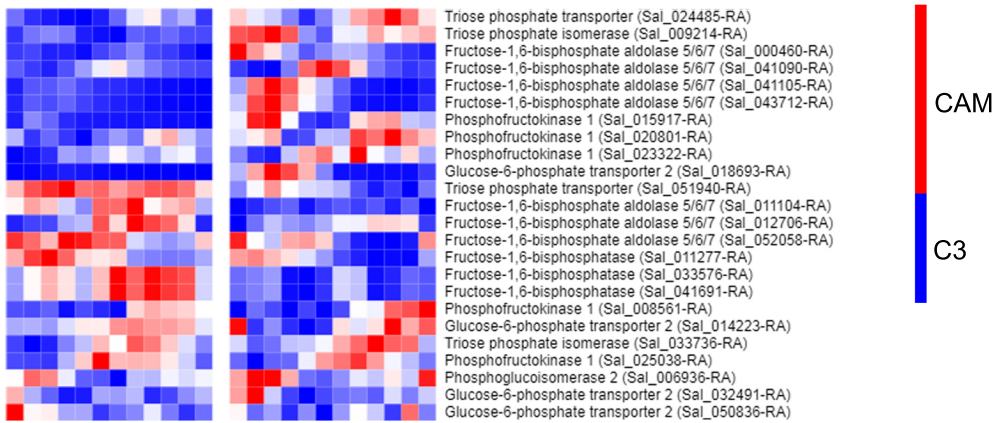

### (c) G6P shunt

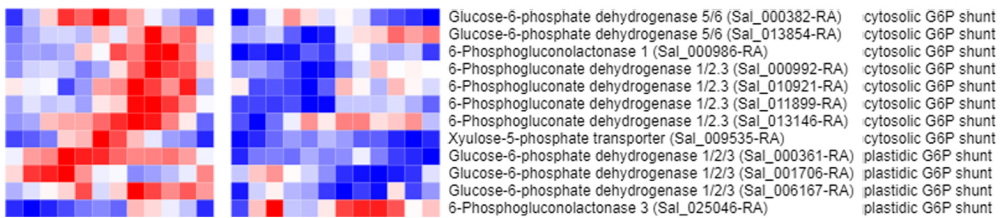

### (d) Starch degradation

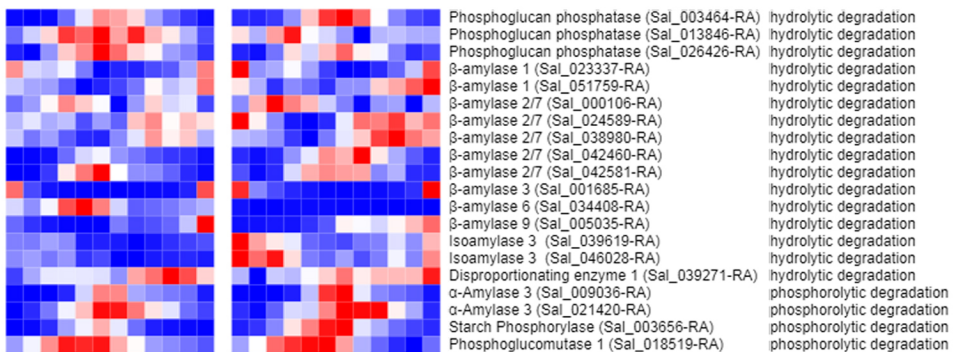

row min row max
