# Supplementary material for: Time of day and network reprogramming during drought induced CAM photosynthesis in Sedum album
Source: PLoS Genet. 2019 Jun 14;15(6):e1008209. doi: 10.1371/journal.pgen.1008209 (PMC6594660; doi:10.1371/journal.pgen.1008209)
Supplement: S4 Table — (XLSX) [file pgen.1008209.s015.xlsx]

## Sheet: Sheet1
S4 Table. Enriched GO terms in well-watered (C3) co-expression network.
C3 Module ID	GO term	GO description	adjusted p-value
3	GO:0015979	photosynthesis	<10E-25
3	GO:0019684	photosynthesis, light reaction	<10E-25
3	GO:0006091	generation of precursor metabolites and energy	1.22245e-20
3	GO:0009768	photosynthesis, light harvesting in photosystem I	2.49805e-17
3	GO:0009767	photosynthetic electron transport chain	4.30515e-15
3	GO:0009765	photosynthesis, light harvesting	6.9095e-15
3	GO:0022900	electron transport chain	2.7638e-10
3	GO:0009644	response to high light intensity	1.5945e-09
3	GO:0044710	single-organism metabolic process	4.09255e-09
3	GO:0018298	protein-chromophore linkage	1.64765e-08
3	GO:0009769	photosynthesis, light harvesting in photosystem II	8.504e-08
3	GO:0009642	response to light intensity	3.9331e-07
3	GO:0009628	response to abiotic stimulus	1.2756e-06
3	GO:0055114	oxidation-reduction process	1.75395e-06
3	GO:0009416	response to light stimulus	5.315e-06
3	GO:0009645	response to low light intensity stimulus	6.9095e-06
3	GO:0009314	response to radiation	1.4882e-05
3	GO:0009773	photosynthetic electron transport in photosystem I	2.8701e-05
3	GO:0010109	regulation of photosynthesis	2.9764e-05
3	GO:0010114	response to red light	4.94295e-05
3	GO:0009266	response to temperature stimulus	6.9095e-05
3	GO:0042548	regulation of photosynthesis, light reaction	0.00020197
3	GO:0010218	response to far red light	0.000526185
3	GO:0043467	regulation of generation of precursor metabolites and energy	0.0007441
3	GO:0010207	photosystem II assembly	0.0026575
3	GO:0009772	photosynthetic electron transport in photosystem II	0.006378
3	GO:0034220	ion transmembrane transport	0.007441
3	GO:0010205	photoinhibition	0.014882
3	GO:0043155	negative regulation of photosynthesis, light reaction	0.014882
3	GO:0044711	single-organism biosynthetic process	0.015945
3	GO:1905156	negative regulation of photosynthesis	0.026575
3	GO:0010035	response to inorganic substance	0.0324215
3	GO:0009408	response to heat	0.0473035
