# Supplementary material for: Time of day and network reprogramming during drought induced CAM photosynthesis in Sedum album
Source: PLoS Genet. 2019 Jun 14;15(6):e1008209. doi: 10.1371/journal.pgen.1008209 (PMC6594660; doi:10.1371/journal.pgen.1008209)
Supplement: S11 Table — (XLSX) [file pgen.1008209.s022.xlsx]

## Sheet: Sheet1
S11 Table. Enriched GO terms in alternated circadian rhythm genes.
Category	GO term	GO description	adjusted p-value
Rhythmic in well-water only	GO:1901566	organonitrogen compound biosynthetic process	1.0634e-05
Rhythmic in well-water only	GO:1901564	organonitrogen compound metabolic process	1.64827e-05
Rhythmic in well-water only	GO:0006412	translation	0.00031902
Rhythmic in well-water only	GO:0043043	peptide biosynthetic process	0.000398775
Rhythmic in well-water only	GO:0043604	amide biosynthetic process	0.000451945
Rhythmic in well-water only	GO:0043603	cellular amide metabolic process	0.00297752
Rhythmic in well-water only	GO:0006518	peptide metabolic process	0.00334971
Rhythmic in well-water only	GO:0006260	DNA replication	0.00489164
Rhythmic in well-water only	GO:0006807	nitrogen compound metabolic process	0.0329654
Rhythmic in well-water only	GO:0006261	DNA-dependent DNA replication	0.0366873
Rhythmic in drought only	GO:0006396	RNA processing	5.317e-07
Rhythmic in drought only	GO:0016458	gene silencing	1.27608e-06
Rhythmic in drought only	GO:0010605	negative regulation of macromolecule metabolism	3.40288e-06
Rhythmic in drought only	GO:0010629	negative regulation of gene expression	7.9755e-06
Rhythmic in drought only	GO:0031047	gene silencing by RNA	1.43559e-05
Rhythmic in drought only	GO:0006397	mRNA processing	1.91412e-05
Rhythmic in drought only	GO:0009892	negative regulation of metabolic process	5.8487e-05
Rhythmic in drought only	GO:0035194	posttranscriptional gene silencing by RNA	0.000451945
Rhythmic in drought only	GO:0016441	posttranscriptional gene silencing	0.000515749
Rhythmic in drought only	GO:0008380	RNA splicing	0.00090389
Rhythmic in drought only	GO:0016071	mRNA metabolic process	0.0010634
Rhythmic in drought only	GO:0040029	regulation of gene expression, epigenetic	0.00420043
Rhythmic in drought only	GO:0031050	dsRNA fragmentation	0.0058487
Rhythmic in drought only	GO:0043331	response to dsRNA	0.0058487
Rhythmic in drought only	GO:0070918	production of small RNA involved in gene silencing by RNA	0.0058487
Rhythmic in drought only	GO:0071359	cellular response to dsRNA	0.0058487
Rhythmic in drought only	GO:0032268	regulation of cellular protein metabolic process	0.0069121
Rhythmic in drought only	GO:0060968	regulation of gene silencing	0.0138242
Rhythmic in drought only	GO:0006325	chromatin organization	0.0233948
Rhythmic in drought only	GO:0043933	macromolecular complex subunit organization	0.031902
Rhythmic in drought only	GO:0000122	negative regulation of transcription from RNA polymerase II	0.031902
Rhythmic in drought only	GO:0031324	negative regulation of cellular metabolic process	0.0441311
Well-water > Drought	GO:0015979	photosynthesis	< 10E-25
Well-water > Drought	GO:0009768	photosynthesis, light harvesting in photosynthesis	< 10E-25
Well-water > Drought	GO:0019684	photosynthesis, light reaction	< 10E-25
Well-water > Drought	GO:0009765	photosynthesis, light harvesting	< 10E-25
Well-water > Drought	GO:0006091	generation of precursor metabolites and energy	< 10E-25
Well-water > Drought	GO:0018298	protein-chromophore linkage	< 10E-25
Well-water > Drought	GO:0009416	response to light stimulus	2.92105e-19
Well-water > Drought	GO:0009628	response to abiotic stimulus	6.9043e-19
Well-water > Drought	GO:0009314	response to radiation	2.60239e-18
Well-water > Drought	GO:0009409	response to cold	3.23971e-13
Well-water > Drought	GO:0009767	photosynthetic electron transport chain	3.87703e-13
Well-water > Drought	GO:0009644	response to high light intensity	7.9665e-13
Well-water > Drought	GO:0009769	photosynthesis, light harvesting in photosystem II	1.00909e-12
Well-water > Drought	GO:1901564	organonitrogen compound metabolic process	7.9665e-12
Well-water > Drought	GO:0009645	response to low light intensity stimulus	7.4354e-11
Well-water > Drought	GO:1901566	organonitrogen compound biosynthetic process	7.9665e-11
Well-water > Drought	GO:0009642	response to light intensity	1.85885e-10
Well-water > Drought	GO:0009266	response to temperature stimulus	7.9665e-10
Well-water > Drought	GO:0008152	metabolic process	5.8421e-09
Well-water > Drought	GO:0050896	response to stimulus	9.0287e-09
Well-water > Drought	GO:0044237	cellular metabolic process	2.1244e-08
Well-water > Drought	GO:0022900	electron transport chain	2.97416e-08
Well-water > Drought	GO:0010218	response to far red light	1.0622e-07
Well-water > Drought	GO:0043604	amide biosynthetic process	1.96507e-07
Well-water > Drought	GO:0010114	response to red light	6.3732e-07
Well-water > Drought	GO:0043603	cellular amide metabolic process	7.9665e-07
Well-water > Drought	GO:0006412	translation	8.4976e-07
Well-water > Drought	GO:0043043	peptide biosynthetic process	9.5598e-07
Well-water > Drought	GO:0009637	response to blue light	1.75263e-06
Well-water > Drought	GO:0006518	peptide metabolic process	3.98325e-06
Well-water > Drought	GO:0055114	oxidation-reduction process	4.2488e-06
Well-water > Drought	GO:0044267	cellular protein metabolic process	3.23971e-05
Well-water > Drought	GO:0009987	cellular process	8.4976e-05
Well-water > Drought	GO:0009635	response to herbicide	0.000127464
Well-water > Drought	GO:0042221	response to chemical	0.000382392
Well-water > Drought	GO:0009639	response to red or far red light	0.000403636
Well-water > Drought	GO:0019538	protein metabolic process	0.00111531
Well-water > Drought	GO:0010207	photosystem II assembly	0.00191196
Well-water > Drought	GO:0009773	photosynthetic electron transport in photosystem I	0.0079665
Well-water > Drought	GO:0006950	response to stress	0.0095598
Well-water > Drought	GO:0042549	photosystem II stabilization	0.0111531
Well-water > Drought	GO:0010035	response to inorganic substance	0.0196507
Well-water > Drought	GO:1905156	negative regulation of photosynthesis	0.0276172
Well-water > Drought	GO:0035304	regulation of protein dephosphorylation	0.0302727
Well-water > Drought	GO:0042548	regulation of photosynthesis, light reaction	0.0355837
Drought > Well-water	GO:1901564	organonitrogen compound metabolic process	1.48876e-07
Drought > Well-water	GO:0010035	response to inorganic substance	2.02046e-07
Drought > Well-water	GO:0006412	translation	3.13703e-07
Drought > Well-water	GO:0043043	peptide biosynthetic process	3.7219e-07
Drought > Well-water	GO:0006518	peptide metabolic process	5.317e-07
Drought > Well-water	GO:0009414	response to water deprivation	1.96729e-06
Drought > Well-water	GO:0009628	response to abiotic stimulus	2.1268e-06
Drought > Well-water	GO:0009415	response to water	2.23314e-06
Drought > Well-water	GO:0043604	amide biosynthetic process	3.34971e-06
Drought > Well-water	GO:0043603	cellular amide metabolic process	1.38242e-05
Drought > Well-water	GO:0006091	generation of precursor metabolites and energy	2.1268e-05
Drought > Well-water	GO:0006950	response to stress	3.77507e-05
Drought > Well-water	GO:0008150	biological process	4.73213e-05
Drought > Well-water	GO:1901566	organonitrogen compound biosynthetic process	5.8487e-05
Drought > Well-water	GO:0015979	photosynthesis	7.9755e-05
Drought > Well-water	GO:0055114	oxidation-reduction process	0.000116974
Drought > Well-water	GO:0009266	response to temperature stimulus	0.000515749
Drought > Well-water	GO:0009409	response to cold	0.00101023
Drought > Well-water	GO:0009735	response to cytokinin	0.00313703
Drought > Well-water	GO:0005977	glycogen metabolic process	0.0079755
Drought > Well-water	GO:0006112	energy reserve metabolic process	0.0079755
Drought > Well-water	GO:0010501	RNA secondary structure unwinding	0.0090389
Drought > Well-water	GO:0050896	response to stimulus	0.0138242
Drought > Well-water	GO:0044237	cellular metabolic process	0.0196729
Drought > Well-water	GO:0042221	response to chemical	0.0271167
